# Supplementary material
Source: Royal Society of Chemistry journal article supplement (doi:10.1039/d6ay00110f)
Supplement: d6ay00110f1.pdf [file d6ay00110f1.pdf]

## Supplementary material

### Green analytical approach for multielemental determination in oily matrices combining extraction induced by emulsion breaking (EIEB) with ICP OES

Maria Isadora Pereira Lima<sup>a</sup>, Lucas Rafael de Moura Domingos<sup>a</sup>, Naomi Akiba<sup>b</sup>,  
Ivanise Gaubeur<sup>a\*</sup>

<sup>a</sup>Human and Natural Sciences Center, Federal University of ABC, Santo André, Brazil

<sup>b</sup>Nova Analítica Importação e Exportação LTDA, Diadema, SP, Brazil

### Parameters of the ICP OES

**Table 1S.** Optimized parameters of the ICP OES.

| Parameters                                |                                                                                                        |
|-------------------------------------------|--------------------------------------------------------------------------------------------------------|
| Energy (kW)                               | 1.10                                                                                                   |
| Plasma gas flow (L min <sup>-1</sup> )    | 16.5                                                                                                   |
| Auxiliary gas flow (L min <sup>-1</sup> ) | 0.75                                                                                                   |
| Nebulizer pressure (kPa)                  | 200                                                                                                    |
| Delay (s)                                 | 0                                                                                                      |
| Integration time (s)                      | 5                                                                                                      |
| Aspiration time (mL)                      | 1                                                                                                      |
| Oxygen flow (L min <sup>-1</sup> )        | 0.15 <sup>a</sup>                                                                                      |
| Emission lines (nm)                       | Cd II (214.439), Cr II (267.716), Cu I (327.396), Ni II (221.647), Ti II (336.122), and V II (292.402) |

<sup>a</sup>for samples containing 2-propanol or 1-butanol media

### Calibration curves parameters

**Table 2S.** Calibration curve parameters in HNO<sub>3</sub> + Triton X-114, 1-butanol, and 2-propanol.

| <b>Metal</b>                                            | <b>Linear coefficient</b> | <b>Angular coefficient</b> | <b>R<sup>2</sup></b> |
|---------------------------------------------------------|---------------------------|----------------------------|----------------------|
| <b>3% (v/v) HNO<sub>3</sub> + 2% (w/v) Triton X-114</b> |                           |                            |                      |
| <b>Cd</b>                                               | -25.92                    | 10.20                      | 0.9978               |
| <b>Cr</b>                                               | -12.02                    | 5.10                       | 0.9976               |
| <b>Cu</b>                                               | -22.02                    | 5.24                       | 0.9975               |
| <b>Ni</b>                                               | -8.57                     | 4.87                       | 0.9982               |
| <b>Ti</b>                                               | 12.62                     | 14.72                      | 0.9992               |
| <b>V</b>                                                | 6.64                      | 9.16                       | 0.9992               |
| <b>1-butanol</b>                                        |                           |                            |                      |
| <b>Cd</b>                                               | 1.75                      | 6.10                       | 0.9999               |
| <b>Cr</b>                                               | -2.23                     | 1.92                       | 0.9996               |
| <b>Cu</b>                                               | 1.60                      | 0.94                       | 0.9999               |
| <b>Ni</b>                                               | -5.09                     | 0.81                       | 0.9997               |
| <b>Ti</b>                                               | 6.01                      | 6.71                       | 0.9995               |
| <b>V</b>                                                | 8.02                      | 4.19                       | 0.9996               |
| <b>2-propanol</b>                                       |                           |                            |                      |
| <b>Cd</b>                                               | 20.1                      | 3.79                       | 0.9953               |
| <b>Cr</b>                                               | 7.97                      | 0.97                       | 0.9957               |
| <b>Cu</b>                                               | 0.77                      | 0.55                       | 0.9932               |
| <b>Ni</b>                                               | 6.88                      | 0.92                       | 0.9920               |
| <b>Ti</b>                                               | 23.2                      | 3.43                       | 0.9950               |
| <b>V</b>                                                | -66.55                    | 4.09                       | 0.9941               |

### t-test statistics

#### Heating times

**Table 3S.** Calculated  $t$  values, critical  $t$  values, and  $p$ -values ( $\alpha = 0.05$ ) for the  $t$ -test of the significance of the difference between the heating times of 15 and 60 min (difference considered significant when  $t_{\text{calc}} > t_{\text{crit}}$ ).

| Metal | $t_{\text{crit}}$ | $t_{\text{calc}}$ | $p$ -value |
|-------|-------------------|-------------------|------------|
| Cd    |                   | 0.20              | 0.854      |
| Cr    |                   | 1.77              | 0.151      |
| Cu    | 2.78              | 1.92              | 0.128      |
| Ni    |                   | 4.17              | 0.014      |
| Ti    |                   | 0.08              | 0.941      |
| V     |                   | 1.41              | 0.232      |

#### Centrifugation times

**Table 4S.** Calculated  $t$  values, critical  $t$  values, and  $p$ -values ( $\alpha = 0.05$ ) for the  $t$ -test of the significance of the difference between the centrifugation times of 15 and 60 min (difference considered significant when  $t_{\text{calc}} > t_{\text{crit}}$ ).

| Metal | $t_{\text{crit}}$ | $t_{\text{calc}}$ | $p$ -value |
|-------|-------------------|-------------------|------------|
| Cd    |                   | 1.98              | 0.12       |
| Cr    |                   | 3.20              | 0.049      |
| Cu    | 2.78              | 2.80              | 0.049      |
| Ni    |                   | 5.73              | 0.029      |
| Ti    |                   | 6.22              | 0.003      |
| V     |                   | 4.13              | 0.015      |

**Table 5S.** Calculated  $t$  values, critical  $t$  values, and  $p$ -values ( $\alpha = 0.05$ ) for the  $t$ -test assessing the significance of the difference between centrifugation times of 15 and 30 min (difference considered significant when  $t_{\text{calc}} > t_{\text{crit}}$ ).

| Metal | $t_{\text{crit}}$ | $t_{\text{calc}}$ | $p$ -value |
|-------|-------------------|-------------------|------------|
| Cd    |                   | 4.90              | 0.008      |
| Cr    |                   | 2.45              | 0.070      |
| Cu    | 2.78              | 0.77              | 0.498      |
| Ni    |                   | 1.86              | 0.160      |
| Ti    |                   | 4.90              | 0.008      |
| V     |                   | 2.97              | 0.041      |

**Table 6S.** Calculated  $t$  values, critical  $t$  values, and  $p$ -values ( $\alpha = 0.05$ ) for the  $t$ -test assessing the significance of the difference between centrifugation times of 45 and 60 min (difference considered significant when  $t_{\text{calc}} > t_{\text{crit}}$ ).

| <b>Metal</b> | <b><math>t_{\text{crit}}</math></b> | <b><math>t_{\text{calc}}</math></b> | <b><math>p</math>-value</b> |
|--------------|-------------------------------------|-------------------------------------|-----------------------------|
| <b>Cd</b>    |                                     | 0.71                                | 0.517                       |
| <b>Cr</b>    |                                     | 6.86                                | 0.006                       |
| <b>Cu</b>    | 2.78                                | 0.39                                | 0.715                       |
| <b>Ni</b>    |                                     | 0.54                                | 0.629                       |
| <b>Ti</b>    |                                     | 1.58                                | 0.189                       |
| <b>V</b>     |                                     | 2.32                                | 0.081                       |

**Table 7S.** Calculated  $t$  values, critical  $t$  values, and  $p$ -values ( $\alpha = 0.05$ ) for the  $t$ -test assessing the significance of the difference between centrifugation times of 15 and 45 min (difference considered significant when  $t_{\text{calc}} > t_{\text{crit}}$ ).

| <b>Metal</b> | <b><math>t_{\text{crit}}</math></b> | <b><math>t_{\text{calc}}</math></b> | <b><math>p</math>-value</b> |
|--------------|-------------------------------------|-------------------------------------|-----------------------------|
| <b>Cd</b>    |                                     | 2.26                                | 0.087                       |
| <b>Cr</b>    |                                     | 3.00                                | 0.040                       |
| <b>Cu</b>    | 2.78                                | 4.41                                | 0.012                       |
| <b>Ni</b>    |                                     | 2.33                                | 0.102                       |
| <b>Ti</b>    |                                     | 12.81                               | 0.0002                      |
| <b>V</b>     |                                     | 2.07                                | 0.107                       |

#### Nitric acid concentrations

**Table 8S.** Calculated  $t$  values, critical  $t$  values, and  $p$ -values ( $\alpha = 0.05$ ) for the  $t$ -test assessing the significance of the difference between nitric acid concentrations ranging from 3 to 15% (difference considered significant when  $t_{\text{calc}} > t_{\text{crit}}$ ).

| <b>Metal</b> | <b><math>t_{\text{crit}}</math></b> | <b><math>t_{\text{calc}}</math></b> | <b><math>p</math>-value</b> |
|--------------|-------------------------------------|-------------------------------------|-----------------------------|
| <b>Cd</b>    |                                     | 1.53                                | 0.200                       |
| <b>Cr</b>    |                                     | 1.16                                | 0.331                       |
| <b>Cu</b>    | 2.78                                | 0.81                                | 0.462                       |
| <b>Ni</b>    |                                     | 2.28                                | 0.085                       |
| <b>Ti</b>    |                                     | 1.34                                | 0.252                       |
| <b>V</b>     |                                     | 3.55                                | 0.024                       |

**Table 9S.** Linear and angular coefficients and determination coefficients of calibration curve in 3% HNO<sub>3</sub> medium.

| Metals    | Linear coefficient | Angular coefficient | R <sup>2</sup> |
|-----------|--------------------|---------------------|----------------|
| <b>Cd</b> | 5.90 ± 2.90        | 3.66 ± 0.23         | 0.9997         |
| <b>Cr</b> | -0.68 ± 2.40       | 2.63 ± 0.07         | 0.9995         |
| <b>Cu</b> | 21.6 ± 12.6        | 3.67 ± 0.18         | 0.9979         |
| <b>Ni</b> | 4.20 ± 2.80        | 0.90 ± 0.01         | 0.9993         |
| <b>Ti</b> | -21.6 ± 5.10       | 12.6 ± 0.5          | 0.9998         |
| <b>V</b>  | -20.5 ± 14.2       | 3.59 ± 0.16         | 0.9995         |

**Table 10S.** Linear and angular coefficients and determination coefficients of the standard addition curves for Conostan<sup>®</sup> mineral oil and the biodiesel reference material.

| Metals                                  | Linear coefficient | Angular coefficient | R <sup>2</sup> |
|-----------------------------------------|--------------------|---------------------|----------------|
| <b>Biodiesel</b>                        |                    |                     |                |
| <b>Cd</b>                               | 79.72 ± 21.3       | 7.75 ± 0.04         | 0.9989         |
| <b>Cr</b>                               | 22.77 ± 5.8        | 3.36 ± 0.10         | 0.9977         |
| <b>Cu</b>                               | 75.6 ± 2.0         | 3.71 ± 0.09         | 0.9999         |
| <b>Ni</b>                               | 14.2 ± 8.7         | 3.43 ± 0.08         | 0.9949         |
| <b>Ti</b>                               | 176.7 ± 37.3       | 10.61 ± 1.36        | 0.9983         |
| <b>V</b>                                | 29.3 ± 3.2         | 7.32 ± 0.22         | 0.9972         |
| <b>Conostan<sup>®</sup> mineral oil</b> |                    |                     |                |
| <b>Cd</b>                               | 13.2 ± 20.3        | 8.47 ± 0.11         | 0.9999         |
| <b>Cr</b>                               | 36.9 ± 8.2         | 3.75 ± 0.12         | 0.9977         |
| <b>Cu</b>                               | 24.8 ± 11          | 4.08 ± 0.16         | 0.9979         |
| <b>Ni</b>                               | 11.4 ± 24.0        | 3.80 ± 0.19         | 0.9988         |
| <b>Ti</b>                               | 128.9 ± 41.7       | 11.51 ± 0.47        | 0.9959         |
| <b>V</b>                                | 49.5 ± 20.0        | 7.39 ± 0.29         | 0.9982         |

**Table 11S.** Linear and angular coefficients and determination coefficients of the standard addition curves for the edible oil samples.

| <b>Metals</b>     | <b>Linear coefficient</b> | <b>Angular coefficient</b> | <b>R<sup>2</sup></b> |
|-------------------|---------------------------|----------------------------|----------------------|
| <b>Canola</b>     |                           |                            |                      |
| <b>Cd</b>         | 15.00 ± 3.1               | 4.51 ± 0.24                | 0.9982               |
| <b>Cr</b>         | 1.64 ± 5.86               | 1.28 ± 0.07                | 0.9971               |
| <b>Cu</b>         | 22.1 ± 28.8               | 2.31 ± 0.16                | 0.9804               |
| <b>Ni</b>         | 28.8 ± 1.7                | 1.89 ± 0.11                | 0.9967               |
| <b>Ti</b>         | 35.8 ± 12.0               | 1.75 ± 0.05                | 0.9846               |
| <b>V</b>          | 17.6 ± 9.6                | 4.54 ± 0.20                | 0.9981               |
| <b>Corn</b>       |                           |                            |                      |
| <b>Cd</b>         | 36.5 ± 15.9               | 5.61 ± 0.25                | 0.9960               |
| <b>Cr</b>         | 15.5 ± 7.1                | 2.04 ± 0.06                | 0.9964               |
| <b>Cu</b>         | 29.1 ± 12.4               | 2.73 ± 0.15                | 0.9841               |
| <b>Ni</b>         | 35.8 ± 10.1               | 2.39 ± 0.13                | 0.9868               |
| <b>Ti</b>         | 65.6 ± 5.4                | 6.79 ± 0.31                | 0.9938               |
| <b>V</b>          | 29.9 ± 7.0                | 6.45 ± 0.15                | 0.9977               |
| <b>Cottonseed</b> |                           |                            |                      |
| <b>Cd</b>         | 9.76 ± 11.23              | 6.41 ± 0.25                | 0.9980               |
| <b>Cr</b>         | 9.81 ± 2.50               | 2.52 ± 0.04                | 0.9997               |
| <b>Cu</b>         | 7.22 ± 0.63               | 3.13 ± 0.07                | 0.9993               |
| <b>Ni</b>         | 17.9 ± 4.2                | 2.85 ± 0.06                | 0.9993               |
| <b>Ti</b>         | 46.6 ± 15.0               | 7.80 ± 0.14                | 0.9992               |
| <b>V</b>          | 16.2 ± 4.4                | 7.19 ± 0.08                | 0.9996               |
| <b>Olive</b>      |                           |                            |                      |
| <b>Cd</b>         | 22.1 ± 7.7                | 5.58 ± 0.24                | 0.9984               |
| <b>Cr</b>         | 24.3 ± 1.7                | 2.09 ± 0.05                | 0.9927               |
| <b>Cu</b>         | 20.4 ± 4.9                | 2.58 ± 0.06                | 0.9933               |
| <b>Ni</b>         | 34.3 ± 8.6                | 2.38 ± 0.14                | 0.9952               |
| <b>Ti</b>         | 130 ± 13                  | 5.76 ± 0.17                | 0.9886               |
| <b>V</b>          | 58.2 ± 8.7                | 5.06 ± 0.12                | 0.9879               |
| <b>Soybean</b>    |                           |                            |                      |
| <b>Cd</b>         | 18.7 ± 4.6                | 5.60 ± 0.01                | 0.9982               |
| <b>Cr</b>         | 20.3 ± 7.0                | 2.00 ± 0.16                | 0.9925               |
| <b>Cu</b>         | 16.1 ± 8.5                | 2.76 ± 0.19                | 0.9956               |
| <b>Ni</b>         | 26.0 ± 5.3                | 2.32 ± 0.08                | 0.9949               |
| <b>Ti</b>         | 119 ± 29                  | 7.39 ± 0.54                | 0.9964               |
| <b>V</b>          | 32.0 ± 3.9                | 5.18 ± 0.11                | 0.9958               |

**Table 11S.** Continuation.

| <b>Sunflower</b> |              |             |        |
|------------------|--------------|-------------|--------|
| <b>Cd</b>        | -0.32 ± 9.77 | 5.14 ± 0.33 | 0.9997 |
| <b>Cr</b>        | 5.81 ± 8.80  | 1.87 ± 0.11 | 0.9988 |
| <b>Cu</b>        | 4.54 ± 7.47  | 2.53 ± 0.10 | 0.9987 |
| <b>Ni</b>        | 14.0 ± 5.1   | 2.23 ± 0.19 | 0.9994 |
| <b>Ti</b>        | 47.5 ± 15.2  | 7.30 ± 0.37 | 0.9964 |
| <b>V</b>         | 24.0 ± 6.2   | 5.77 ± 0.11 | 0.9970 |

**Table 12S.** Linear and angular coefficients and determination coefficients of the standard addition coefficients of the standard addition curves for the essential oil.

| <b>Metals</b>   | Linear coefficient | Angular coefficient | R <sup>2</sup> |
|-----------------|--------------------|---------------------|----------------|
| <b>Lavender</b> |                    |                     |                |
| <b>Cd</b>       | -8.26 ± 3.20       | 6.04 ± 0.05         | 0.9995         |
| <b>Cr</b>       | 10.6 ± 2.4         | 3.03 ± 0.06         | 0.9995         |
| <b>Cu</b>       | 0.21 ± 3.15        | 4.41 ± 0.10         | 0.9999         |
| <b>Ni</b>       | -1.72 ± 6.78       | 3.04 ± 0.09         | 0.9990         |
| <b>Ti</b>       | 31.1 ± 6.6         | 12.1 ± 0.2          | 0.9996         |
| <b>V</b>        | -6.71 ± 5.34       | 7.32 ± 0.06         | 0.9998         |
| <b>Lemon</b>    |                    |                     |                |
| <b>Cd</b>       | 6.73 ± 11.07       | 4.30 ± 0.11         | 0.9994         |
| <b>Cr</b>       | 0.47 ± 8.66        | 2.62 ± 0.04         | 0.9968         |
| <b>Cu</b>       | 5.13 ± 4.12        | 1.55 ± 2.49         | 0.9996         |
| <b>Ni</b>       | 2.19 ± 4.96        | 2.12 ± 0.07         | 0.9990         |
| <b>Ti</b>       | 71.3 ± 6.9         | 9.18 ± 0.18         | 0.9996         |
| <b>V</b>        | 11.4 ± 8.5         | 5.19 ± 0.03         | 0.9997         |
| <b>Clove</b>    |                    |                     |                |
| <b>Cd</b>       | 6.83 ± 7.7         | 5.58 ± 0.29         | 0.9995         |
| <b>Cr</b>       | 0.04 ± 2.5         | 2.57 ± 0.02         | 0.9954         |
| <b>Cu</b>       | 6.38 ± 0.71        | 2.83 ± 0.01         | 0.9923         |
| <b>Ni</b>       | 7.6 ± 2.9          | 2.57 ± 0.14         | 0.9939         |
| <b>Ti</b>       | -15.5 ± 10         | 7.76 ± 0.20         | 0.9959         |
| <b>V</b>        | -3.66 ± 4          | 5.01 ± 0.02         | 0.9952         |

**Table 13S.** Precision (intra- and interday) n=3.

| <b>Metal<br/>Concentration <math>\mu\text{g kg}^{-1}</math></b> | <b>Intraday<br/>(CV, %)</b> | <b>Interday<br/>(CV, %)</b> |
|-----------------------------------------------------------------|-----------------------------|-----------------------------|
| <b>Cd</b>                                                       |                             |                             |
| 60.0                                                            | 4.42                        | 4.15                        |
| 120                                                             | 0.740                       | 4.29                        |
| 240                                                             | 0.808                       | 6.50                        |
| <b>Cr</b>                                                       |                             |                             |
| 60.0                                                            | 4.20                        | 4.24                        |
| 120                                                             | 2.30                        | 4.32                        |
| 240                                                             | 3.00                        | 4.07                        |
| <b>Cu</b>                                                       |                             |                             |
| 60.0                                                            | 4.63                        | 4.13                        |
| 120                                                             | 2.42                        | 3.99                        |
| 240                                                             | 3.48                        | 3.43                        |
| <b>Ti</b>                                                       |                             |                             |
| 60.0                                                            | 3.75                        | 3.77                        |
| 120                                                             | 4.10                        | 5.55                        |
| 240                                                             | 3.45                        | 3.90                        |
| <b>Ni</b>                                                       |                             |                             |
| 60.0                                                            | 4.61                        | 5.78                        |
| 120                                                             | 3.72                        | 3.54                        |
| 240                                                             | 2.97                        | 2.85                        |
| <b>V</b>                                                        |                             |                             |
| 60.0                                                            | 4.04                        | 4.34                        |
| 120                                                             | 1.98                        | 4.55                        |
| 240                                                             | 3.52                        | 3.77                        |

### Criteria, scoring, and weight considered in the Agree

| Criteria                                                                                                                             | Score | Weight |
|--------------------------------------------------------------------------------------------------------------------------------------|-------|--------|
| 1. Direct analytical techniques should be applied to avoid sample treatment.                                                         | 0.3   | 2      |
| 2. Minimal sample size and minimal number of samples are goals.                                                                      | 0.65  | 2      |
| 3. If possible, measurements should be performed in situ.                                                                            | 0.0   | 2      |
| 4. Integration of analytical processes and operations saves energy and reduces the use of reagents.                                  | 1.0   | 2      |
| 5. Automated and miniaturized methods should be selected.                                                                            | 0.75  | 2      |
| 6. Derivatization should be avoided.                                                                                                 | 1.0   | 2      |
| 7. Generation of a large volume of analytical waste should be avoided, and proper management of analytical waste should be provided. | 0.69  | 2      |
| 8. Multi-analyte or multi-parameter methods are preferred versus methods using one analyte at a time.                                | 1.0   | 2      |
| 9. The use of energy should be minimized.                                                                                            | 1.0   | 2      |
| 10. Reagents obtained from renewable sources should be preferred.                                                                    | 0.0   | 2      |
| 11. Toxic reagents should be eliminated or replaced.                                                                                 | 0.59  | 2      |
| 12. Operator's safety should be increased.                                                                                           | 0.8   | 2      |

**Fig. 1S** Criteria, scoring, and weight considered in the Agree Software for the sample preparation steps.

### Criteria, scoring, and weight considered in the Agreeprep.

| #   | Criterion                                                   |                                                                                         | Score | Weight |
|-----|-------------------------------------------------------------|-----------------------------------------------------------------------------------------|-------|--------|
| 1.  | Sample preparation placement:                               | Ex situ                                                                                 | 0.00  | 1      |
| 2.  | Hazardous materials:                                        | 0 [g or mL]                                                                             | 1.00  | 5      |
| 3.  | Sustainability, renewability, and reusability of materials: | < 25% of reagents and materials are sustainable or renewable, but can only be used ONCE | 0.00  | 2      |
| 4.  | Waste:                                                      | 1 [g or mL]                                                                             | 0.63  | 4      |
| 5.  | Size economy of the sample                                  | Mass or volume of the sample: 1 [g or mL]                                               | 0.67  | 2      |
| 6.  | Sample throughput:                                          | 36 [samples/h]                                                                          | 0.84  | 3      |
| 7.  | Integration and automation                                  | Sample prep. steps: 3 steps, Semi-automated systems                                     | 0.38  | 2      |
| 8.  | Energy consumption:                                         | 11.5 [W]                                                                                | 0.96  | 4      |
| 9.  | Post-sample preparation configuration for analysis:         | Advanced MS with high energy and/or noble gas consumption: ICP-OES, ICP-MS, etc.        | 0.00  | 2      |
| 10. | Operator's safety:                                          | 1 hazard                                                                                | 0.75  | 3      |

Fig. 2S Criteria, scoring, and weight considered in the Agreeprep Software for the sample preparation steps.

**Table 14S.** Comparison of the EIEB proposed method with other for metals determination in oily samples.

| Samples                                                                                                           | EIEB procedure                                                                                                                   | Analyte                          | LOD                                                                                                                | References |
|-------------------------------------------------------------------------------------------------------------------|----------------------------------------------------------------------------------------------------------------------------------|----------------------------------|--------------------------------------------------------------------------------------------------------------------|------------|
| Olive oil, sunflower, fish oil, soybean, canola, and corn                                                         | Sample quantity: 1g. 2% TX-114 and 3% HNO <sub>3</sub> . Vortex 30s. Heating (90 °C) – 60 min                                    | Sn                               | GF AAS 1.1 µg L <sup>-1</sup> and ICP-MS 0.009 µg L <sup>-1</sup>                                                  | 22         |
| Crude palm oil                                                                                                    | Sample quantity: 5 mL. 4% TX-114 and 2.0 mol L <sup>-1</sup> HNO <sub>3</sub> . Sonication time 18 min. Heating (90 °C) – 30 min | Cd and Pb                        | GF AAS 0.052 µg kg <sup>-1</sup> (Cd) and 0.040 µg kg <sup>-1</sup> (Pb)                                           | 25         |
| Olive oil, avocado, babassu, primrose, coconut, piquí or souari nut, licuri, and grape seed oil                   | Sample quantity: 1 mL. 30% TX-100 and 30% HNO <sub>3</sub> . Vortex 20s. Heating (90 °C) – 20 min                                | Al, Ba, Cu, Cr, P, Ni, Ti and Zn | MIP OES 0.4-3.7 µg kg <sup>-1</sup> 3.7 (Al), 0.6 (Ba and Cu), 0.7 (Cr), 0.9 (P), 1.0 (Ni), 2.0 (Ti), and 0.4 (Zn) | 43         |
| Soybean oil, canola, corn, sunflower, coconut, olive oil and cottonseed                                           | Sample quantity: 5.5 mL. 1.0% TX-114 and 3.0 mol L <sup>-1</sup> HNO <sub>3</sub> . Sonication time 12 min. Heating (90 °C)      | Ca, Fe, Mg and Zn                | HR-CS AAS 4.32-11.0 µg L <sup>-1</sup> 4.32 (Ca), 7.53 (Fe), 11.0 (Mg), and 7.89 (Zn)                              | 42         |
| Essential oils (clove, lavender and lemon), biodiesel, cottonseed, canola, sunflower, soybean, corn and olive oil | Sample quantity: 1g. 2% TX-114 and 3% HNO <sub>3</sub> . Vortex 60s. Heating (90 °C) – 15 min                                    | Cd, Cr, Cu, Ni, V and Ti         | ICP OES 0.20 – 0.80 µg kg <sup>-1</sup> 0.20 (Cd), 0.60 (Cr), 0.70 (Cu), 0.50 (Ni), 0.60 (Ti) and 0.80 (V)         | This work  |

GF AAS: graphite furnace atomic absorption spectrometry; MIP OES: microwave-induced plasma optical emission spectrometry; HR-CS FAAS: high-resolution continuum source flame atomic absorption spectrometry
